# Supplementary material for: Comparative Analysis of Antioxidant Accumulation under Cold Acclimation, Deacclimation and Reacclimation in Winter Wheat
Source: MDPI journal article supplement (doi:10.3390/plants11212818), 2022-10-23
Supplement: s1 [file s1]

# Comparative analysis of antioxidant accumulation under cold acclimation, deacclimation and reacclimation in winter wheat

**Table S1.** Descriptive statistics and Wilcoxon rank sum test results of antioxidant concentration values between tissues in constant low-temperature (CLT) and prolonged higher low-temperature (PHLT) treatments.

| Treat-<br>ment | Antioxidant                            | CTRL                    |                       |                   | CA                   |                       |                   | DEA                  |                       |                   | REA                  |                       |                   |
|----------------|----------------------------------------|-------------------------|-----------------------|-------------------|----------------------|-----------------------|-------------------|----------------------|-----------------------|-------------------|----------------------|-----------------------|-------------------|
|                |                                        | Leaf<br>mean<br>± SD    | Crown<br>mean<br>± SD | p-value           | Leaf<br>mean<br>± SD | Crown<br>mean<br>± SD | p-value           | Leaf<br>mean<br>± SD | Crown<br>mean<br>± SD | p-value           | Leaf<br>mean<br>± SD | Crown<br>mean<br>± SD | p-value           |
| CLT            | Total ascorbate<br>(nmol/mg FW)        | 4.48 ±<br>0.76          | 1.62 ±<br>0.81        | 8.65E-<br>07 ***  | 14.01 ±<br>1.30      | 4.74 ±<br>1.37        | 4.81E-<br>07 ***  | 8.01 ±<br>1.03       | 2.53 ±<br>0.55        | 3.22E-<br>07 ***  | 8.21 ±<br>0.75       | 2.64 ±<br>0.37        | 3.22E-<br>07 ***  |
|                | ASC<br>(nmol/mg FW)                    | 3.01 ±<br>0.46          | 2.39 ±<br>0.79        | 0.00991<br>2 **   | 10.67 ±<br>1.38      | 5.15 ±<br>0.89        | 4.41E-<br>10 ***  | 6.55 ±<br>1.21       | 2.72 ±<br>0.51        | 3.11E-<br>07 ***  | 7.93 ±<br>1.18       | 2.44 ±<br>0.367       | 3.22E-<br>07 ***  |
|                | DHA<br>(nmol/mg FW)                    | 1.47 ±<br>0.44          | NA ±<br>NA            | NA                | 3.34 ±<br>0.85       | 0.19 ±<br>0.09        | 0.00771<br>7 **   | 1.46 ±<br>0.63       | 0.18 ±<br>0.14        | 0.02735<br>*      | 0.76 ±<br>0.37       | 0.23 ±<br>0.17        | 1.94E-<br>04 ***  |
|                | ASC / DHA ratio                        | 2.26 ±<br>0.84          | NA ±<br>NA            | NA                | 3.52 ±<br>1.38       | 34.31 ±<br>21.92      | 0.00150<br>4 **   | 5.90 ±<br>4.05       | 23.15 ±<br>19.52      | 0.04211<br>*      | 12.28 ±<br>8.06      | 30.84 ±<br>54.86      | 0.4221            |
|                | Total glutathi-<br>one<br>(pmol/mg FW) | 218.94<br>± 51.20       | 327.29 ±<br>152.05    | 0.01418<br>*      | 1071.53<br>± 232.70  | 738.68 ±<br>157.79    | 2.19E-<br>05 ***  | 771.49 ±<br>166.18   | 642.88 ±<br>187.51    | 0.05086           | 1052.99<br>± 322.03  | 1221.19<br>± 270.75   | 0.07359           |
|                | GSH<br>(pmol/mg FW)                    | 173.06<br>± 51.73       | 279.83 ±<br>151.50    | 0.0224 *          | 951.45 ±<br>226.35   | 675.23 ±<br>163.52    | 0.00110<br>6 **   | 711.41 ±<br>155.45   | 619.97 ±<br>186.62    | 0.1401            | 903.60 ±<br>257.63   | 1017.54<br>± 231.55   | 0.1427            |
|                | GSSG<br>(pmol/mg FW)                   | 22.94 ±<br>16.32        | 29.37 ±<br>14.59      | 0.05939           | 60.04 ±<br>33.81     | 33.15 ±<br>14.94      | 0.01585<br>*      | 29.59 ±<br>19.34     | 9.07 ±<br>7.03        | 7.44E-<br>05 ***  | 74.70 ±<br>46.20     | 101.82 ±<br>50.98     | 0.1341            |
|                | GSH / GSSG ra-<br>tio                  | 17.28 ±<br>33.38        | 13.25 ±<br>13.77      | 0.6702            | 22.12 ±<br>14.37     | 26.38 ±<br>16.43      | 0.5115            | 57.62 ±<br>114.87    | 392.34 ±<br>1121.34   | 0.00012<br>78 *** | 16.46 ±<br>10.63     | 13.98 ±<br>12.34      | 0.1427            |
|                | NAD <sup>+</sup><br>(pmol/mg FW)       | 24.64 ±<br>15.66        | 60.86 ±<br>19.75      | 0.00017<br>41 *** | 42.68 ±<br>26.54     | 109.22 ±<br>16.54     | 2.06E-<br>08 ***  | 24.64 ±<br>13.62     | 62.77 ±<br>23.82      | 1.55E-<br>05 ***  | 39.12 ±<br>14.70     | 96.91 ±<br>19.84      | 8.82E-<br>10 ***  |
|                | NADP <sup>+</sup><br>(pmol/mg FW)      | 6.05 ±<br>3.27          | 7.83 ±<br>5.04        | 0.331             | 15.70 ±<br>9.19      | 9.87 ±<br>3.70        | 0.04103<br>*      | 1.69 ±<br>1.83       | 4.17 ±<br>2.18        | 0.00671<br>2 **   | 3.04 ±<br>2.09       | 7.44 ±<br>2.13        | 4.10E-<br>05 ***  |
| PHLT           | Total ascorbate<br>(nmol/mg FW)        | 4.48 ±<br>0.76          | 1.62 ±<br>0.81        | 8.65E-<br>07      | 7.29 ±<br>0.63       | 2.03 ±<br>0.36        | 3.21E-<br>07 ***  | 7.17 ±<br>0.78       | 1.51 ±<br>0.38        | 3.22E-<br>07 ***  | 7.22 ±<br>0.66       | 1.50 ±<br>0.42        | 3.22E-<br>07 ***  |
|                | ASC<br>(nmol/mg FW)                    | 3.01 ±<br>0.46          | 2.39 ±<br>0.79        | 0.00991<br>2 **   | 6.47 ±<br>0.94       | 2.17 ±<br>0.37        | 2.20E-<br>10 ***  | 6.16 ±<br>0.93       | 1.66 ±<br>0.40        | 3.22E-<br>07 ***  | 7.61 ±<br>0.92       | 1.42 ±<br>0.38        | 2.20E-<br>10 ***  |
|                | DHA<br>(nmol/mg FW)                    | 1.47 ±<br>0.44          | NA ±<br>NA            | NA                | 0.96 ±<br>0.64       | 0.10 ±<br>0.03        | 0.00495<br>4 **   | 1.07 ±<br>0.60       | 0.04 ±<br>0.01        | 0.0117 *          | 0.46 ±<br>0.27       | 0.12 ±<br>0.07        | 0.0491 *          |
|                | ASC / DHA ratio                        | 2.26 ±<br>0.84          | NA ±<br>NA            | NA                | 26.85 ±<br>69.17     | 20.78 ±<br>7.58       | 0.02188<br>*      | 11.62 ±<br>19.31     | 40.91 ±<br>26.54      | 0.07018           | 32.93 ±<br>41.68     | 19.12 ±<br>17.94      | 0.457             |
|                | Total glutathi-<br>one<br>(pmol/mg FW) | 218.94<br>± 51.20       | 327.29 ±<br>152.05    | 0.01418<br>*      | 683.48 ±<br>168.46   | 603.48 ±<br>164.18    | 0.2292            | 563.82 ±<br>59.98    | 538.17 ±<br>107.46    | 0.4235            | 800.23 ±<br>211.32   | 678.67 ±<br>213.08    | 0.09706           |
|                | GSH<br>(pmol/mg FW)                    | 173.06<br>± 51.73       | 279.83 ±<br>151.51    | 0.0224 *          | 652.07 ±<br>172.27   | 547.14 ±<br>149.94    | 0.1437            | 540.07 ±<br>66.92    | 535.11 ±<br>106.30    | 0.9145            | 739.99 ±<br>183.74   | 584.22 ±<br>195.21    | 0.01028<br>*      |
|                | GSSG<br>(pmol/mg FW)                   | 22.94 ±<br>16.3230<br>1 | 29.37 ±<br>14.59      | 0.05939           | 20.24 ±<br>19.47     | 8.02 ±<br>5.71        | 0.0196 *          | 14.87 ±<br>12.04     | 6.22 ±<br>3.82        | 0.03764<br>*      | 22.81 ±<br>15.41     | 47.23 ±<br>22.73      | 0.00046<br>75 *** |
|                | GSH / GSSG ra-<br>tio                  | 17.28 ±<br>33.38        | 13.25 ±<br>13.77      | 0.6702            | 66.11 ±<br>64.79     | 146.88 ±<br>199.42    | 0.1006            | 115.25 ±<br>179.23   | 134.50 ±<br>110.42    | 0.05677           | 47.33 ±<br>30.95     | 15.12 ±<br>8.30       | 1.54E-<br>06 ***  |
|                | NAD <sup>+</sup><br>(pmol/mg FW)       | 24.64 ±<br>15.66        | 60.86 ±<br>19.75      | 0.00017<br>41 *** | 35.82 ±<br>14.78     | 58.49 ±<br>19.48      | 0.00086<br>53 *** | 20.01 ±<br>14.94     | 40.69 ±<br>14.05      | 0.00058<br>28 *** | 39.90 ±<br>17.90     | 56.05 ±<br>13.61      | 0.00963<br>1 **   |
|                | NADP <sup>+</sup><br>(pmol/mg FW)      | 6.05 ±<br>3.27          | 7.83 ±<br>5.04        | 0.331             | 13.06 ±<br>6.26      | 2.024 ±<br>1.40       | 7.32E-<br>07 ***  | 10.64 ±<br>6.21      | 2.65 ±<br>1.86        | 0.00010<br>18 *** | 9.11 ±<br>4.75       | 2.96 ±<br>2.04        | 3.69E-<br>05 ***  |

\* indicates significant differences at  $p < 0.05$ , \*\* at  $p < 0.01$ , and \*\*\* at  $p < 0.001$ .

**Table S2.** Descriptive statistics and Wilcoxon rank sum test results of antioxidant concentration values between constant low-temperature (CLT) and prolonged higher low-temperature (PHLT) treatments in leaf and crown tissues.

| Tissue | Antioxidant                       | CA                  |                    |                  | DEA                 |                         |                  | REA                 |                    |                  |
|--------|-----------------------------------|---------------------|--------------------|------------------|---------------------|-------------------------|------------------|---------------------|--------------------|------------------|
|        |                                   | CLT mean<br>± SD    | PHLT<br>mean ± SD  | p-value          | CLT mean<br>± SD    | PHLT<br>mean ± SD       | p-value          | CLT mean<br>± SD    | PHLT<br>mean ± SD  | p-value          |
| LEAF   | Total ascorbate<br>(nmol/mg FW)   | 14.01 ± 1.30        | 7.29 ± 0.63        | 3.22E-07<br>***  | 8.01 ± 1.03         | 7.17 ± 0.78             | 0.01137 *        | 8.21 ± 0.75         | 7.22 ± 0.66        | 1.81E-04<br>***  |
|        | ASC<br>(nmol/mg FW)               | 10.67 ± 1.38        | 6.47 ± 0.94        | 2.20E-10<br>***  | 6.55 ± 1.21         | 6.16 ± 0.92             | 0.4764           | 7.93 ± 1.18         | 7.61 ± 0.92        | 0.5841           |
|        | DHA<br>(nmol/mg FW)               | 3.34 ± 0.85         | 0.96 ± 0.64        | 1.92E-06<br>***  | 1.46 ± 0.63         | 1.07 ± 0.60             | 0.05983          | 0.76 ± 0.37         | 0.46 ± 0.27        | 0.2958           |
|        | ASC / DHA<br>ratio                | 3.52 ± 1.38         | 26.85 ±<br>69.17   | 0.0003117<br>*** | 5.90 ± 4.05         | 11.62 ±<br>19.31        | 0.2066           | 12.28 ± 8.06        | 32.93 ±<br>41.68   | 0.4117           |
|        | Total glutathione<br>(pmol/mg FW) | 1071.53 ±<br>232.70 | 683.48 ±<br>168.46 | 1.26E-06<br>***  | 771.49 ±<br>166.18  | 563.82 ±<br>59.98       | 1.80E-05<br>***  | 1052.99 ±<br>322.03 | 800.23 ±<br>211.32 | 0.005761 **      |
|        | GSH<br>(pmol/mg FW)               | 951.45 ±<br>226.35  | 652.07 ±<br>172.27 | 7.83E-05<br>***  | 711.41 ±<br>155.45  | 540.07 ±<br>66.92       | 0.00029 ***      | 903.60 ±<br>257.63  | 739.99 ±<br>183.74 | 0.0349           |
|        | GSSG<br>(pmol/mg FW)              | 60.04 ±<br>33.81    | 20.24 ±<br>19.47   | 1.19E-04<br>***  | 29.59 ±<br>19.34    | 14.87 ±<br>12.04        | 0.01513 *        | 74.70 ±<br>46.20    | 22.81 ±<br>15.41   | 1.20E-05<br>***  |
|        | GSH / GSSG<br>ratio               | 22.12 ±<br>14.37    | 66.11 ±<br>64.79   | 0.008856 **      | 57.62 ±<br>114.87   | 115.25 ±<br>179.23      | 0.05827          | 16.46 ±<br>10.63    | 47.33 ±<br>30.95   | 1.80E-05<br>***  |
|        | NAD <sup>+</sup><br>(pmol/mg FW)  | 42.68 ±<br>26.54    | 35.82 ±<br>14.78   | 0.5281           | 24.64 ±<br>13.62    | 20.01 ±<br>14.94        | 0.3378           | 39.12 ±<br>14.70    | 39.90 ±<br>17.90   | 1                |
|        | NADP <sup>+</sup><br>(pmol/mg FW) | 15.70 ± 9.19        | 13.06 ± 6.26       | 0.3753           | 1.69 ± 1.83         | 10.64 ± 6.21            | 0.0001351<br>*** | 3.04 ± 2.09         | 9.11 ± 4.75        | 0.0002695<br>*** |
| CROWN  | Total ascorbate<br>(nmol/mg FW)   | 4.74 ± 1.37         | 2.03 ± 0.36        | 9.01E-06<br>***  | 2.53 ± 0.55         | 1.510556 ±<br>0.3797441 | 2.57E-05<br>***  | 2.64 ± 0.37         | 1.50 ± 0.42        | 8.64E-07<br>***  |
|        | ASC<br>(nmol/mg FW)               | 5.15 ± 0.89         | 2.17 ± 0.37        | 4.41E-10<br>***  | 2.72 ± 0.51         | 1.66 ± 0.40             | 1.15E-05<br>***  | 2.44 ± 0.37         | 1.42 ± 0.38        | 1.64E-06<br>***  |
|        | DHA<br>(nmol/mg FW)               | 0.19 ± 0.09         | 0.10 ± 0.03        | 0.4              | 0.18 ± 0.14         | 0.04 ± 0.01             | 0.3333           | 0.23 ± 0.17         | 0.12 ± 0.07        | 0.08391          |
|        | ASC / DHA<br>ratio                | 34.31 ±<br>21.92    | 20.78 ± 7.58       | 0.6286           | 23.15 ±<br>19.52    | 40.91 ±<br>26.54        | 0.6667           | 30.84 ±<br>54.86    | 19.12 ±<br>17.94   | 0.951            |
|        | Total glutathione<br>(pmol/mg FW) | 738.68 ±<br>157.79  | 603.48 ±<br>164.18 | 0.03202 *        | 642.88 ±<br>187.51  | 538.17 ±<br>107.46      | 0.1182           | 1221.19 ±<br>270.75 | 678.67 ±<br>213.08 | 4.60E-07<br>***  |
|        | GSH<br>(pmol/mg FW)               | 675.23 ±<br>163.52  | 547.14 ±<br>149.94 | 0.06826          | 619.97 ±<br>186.62  | 535.11 ±<br>106.30      | 0.2621           | 1017.54 ±<br>231.55 | 584.22 ±<br>195.21 | 2.53E-06<br>***  |
|        | GSSG<br>(pmol/mg FW)              | 33.15 ±<br>14.94    | 8.02 ± 5.71        | 4.49E-06<br>***  | 9.07 ± 7.03         | 6.22 ± 3.82             | 0.3163           | 101.82 ±<br>50.98   | 47.23 ±<br>22.73   | 9.59E-05<br>***  |
|        | GSH / GSSG<br>ratio               | 26.38 ±<br>16.43    | 146.88 ±<br>199.42 | 3.72E-05<br>***  | 392.34 ±<br>1121.34 | 134.50 ±<br>110.42      | 0.6623           | 13.98 ±<br>12.34    | 15.12 ± 8.30       | 0.2142           |
|        | NAD <sup>+</sup><br>(pmol/mg FW)  | 109.22 ±<br>16.54   | 58.49 ±<br>19.48   | 2.95E-08<br>***  | 62.77 ±<br>23.82    | 40.69 ±<br>14.05        | 0.005631 *       | 96.91 ±<br>19.84    | 56.05 ±<br>13.61   | 1.12E-07<br>***  |
|        | NADP <sup>+</sup><br>(pmol/mg FW) | 9.87 ± 3.70         | 2.024 ± 1.40       | 7.71E-08<br>***  | 4.17 ± 2.18         | 2.65 ± 1.86             | 0.05945          | 7.44 ± 2.13         | 2.96 ± 2.04        | 1.77E-07<br>***  |

\* indicates significant differences at  $p < 0.05$ , \*\* at  $p < 0.01$ , and \*\*\* at  $p < 0.001$ .

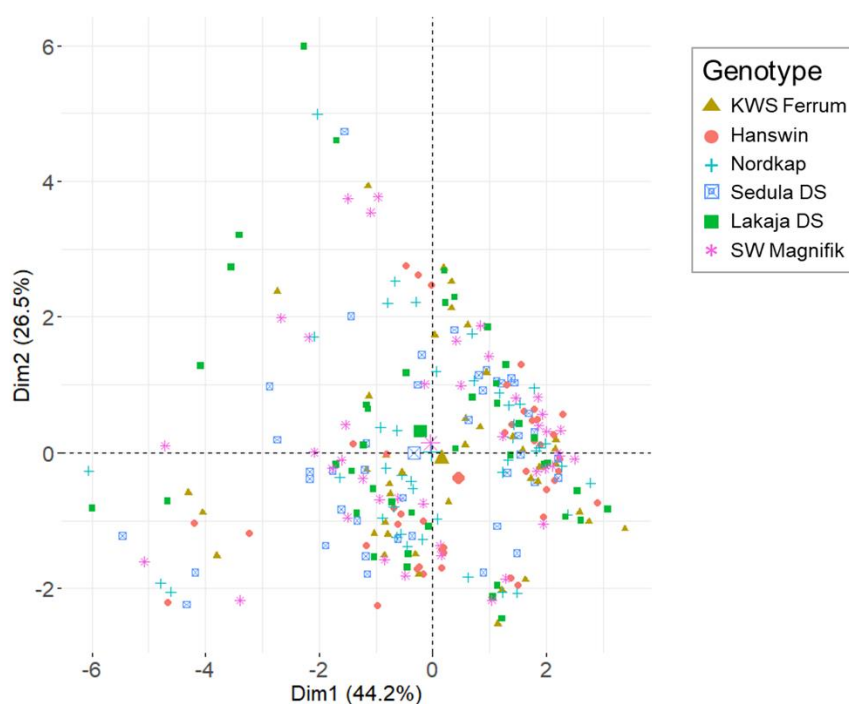

**Figure S1.** Principal component analysis (PCA) of antioxidants, measured throughout the experiment under constant low-temperature (CLT) and prolonged higher low-temperature (PHLT) treatments, grouped by genotype.

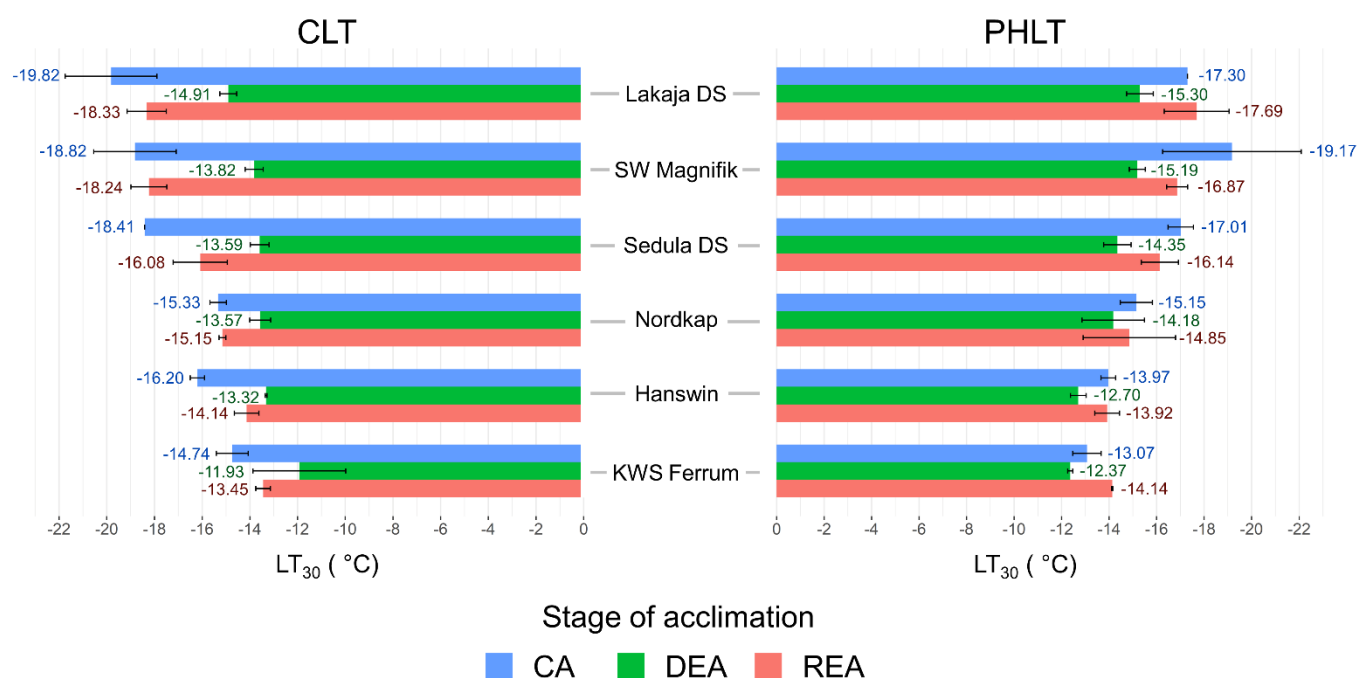

**Figure S2.** LT<sub>30</sub> (temperature, under which 30% of plants die) values of six different winter wheat genotypes after cold acclimation (CA), deacclimation (DEA) and reacclimation (REA) under constant low-temperature (CLT) and prolonged higher low-temperature (PHLT) treatments. This data was discussed by Vaitkevičiūtė et al. (2022) [1].

## References

1. Vaitkevičiūtė, G.; Aleliūnas, A.; Gibon, Y.; Armonienė, R. The Effect of Cold Acclimation, Deacclimation and Reacclimation on Metabolite Profiles and Freezing Tolerance in Winter Wheat. *Front. Plant Sci.* **2022**, *13*, doi:10.3389/fpls.2022.959118.
